# Supplementary material for: Response of Arctic temperature to changes in emissions of short-lived climate forcers
Source: Springer Nature journal article supplement (doi:10.1038/nclimate2880), 2015-11-30
Supplement: 41558_2016_BFnclimate2880_MOESM461_ESM.pdf [file 41558_2016_BFnclimate2880_MOESM461_ESM.pdf]

# Response of Arctic temperature to changes in emissions of short-lived climate forcers

M. Sand, T. K. Berntsen, K. von Salzen, M. G. Flanner, J. Langner and D. G. Victor

## Model set-up

The configuration and output of the five models used in this study are shown in table S1. The defined regions are shown in figure S1. The emissions for each component, sector and region are given in Table S2.

**Table S1:** Configuration, resolution and references for the models used in this study. All models use identical 2010 ECLIPSE emissions (IIASA) and 2006-2010 inter-annually-varying prescribed SST's.

| Model             | Configuration and output                                                                                                                                                                 | Resolution                                | References                                                                               |
|-------------------|------------------------------------------------------------------------------------------------------------------------------------------------------------------------------------------|-------------------------------------------|------------------------------------------------------------------------------------------|
| <b>CAM5.2</b>     | Meteorology generated by the model. MAM7 aerosols.<br>Aerosol direct+ snow/ice RF                                                                                                        | 1.9°×2.5°. 30 vertical levels             | Liu et al. (2012)<br>Wang et al (2013)<br>Neale et al (2010)                             |
| <b>CanAM4.2</b>   | Meteorology generated by the model, with nudging of winds and temperature towards a free control run. PLA Aerosol model.<br>Aerosol direct+indirect+snow/ice RF (global emissions only). | T63. 49 vertical levels                   | von Salzen, et al. (2013)<br>von Salzen (2006)<br>Peng et al. (2012)<br>Ma et al. (2008) |
| <b>NorESM</b>     | Meteorology generated by the model. Cam-Oslo aerosol module.<br>Aerosol direct+indirect RF                                                                                               | 1.9°×2.5°, 26 vertical levels.            | Kirkevåg et al.(2013)<br>Iversen et al. (2013)<br>Bentsen et al. (2013)                  |
| <b>Oslo-CTM2</b>  | ECMWF reanalysis from the Integrated Forecast System (IFS) model. Bulk aerosols.<br>O <sub>3</sub> direct RF                                                                             | T42, 60 vertical levels.                  | Skeie et al. (2011)<br>Myhre et al. (2009)                                               |
| <b>SMHI-MATCH</b> | ECMWF ERA-Interim reanalysis meteorology.<br>Bulk aerosols.<br>Aerosol direct+O <sub>3</sub> direct RF                                                                                   | 0.75°×0.75°, 20N-90N, 38 vertical levels. | Andersson et al. (2007)<br>Robertson et al. (1999)                                       |

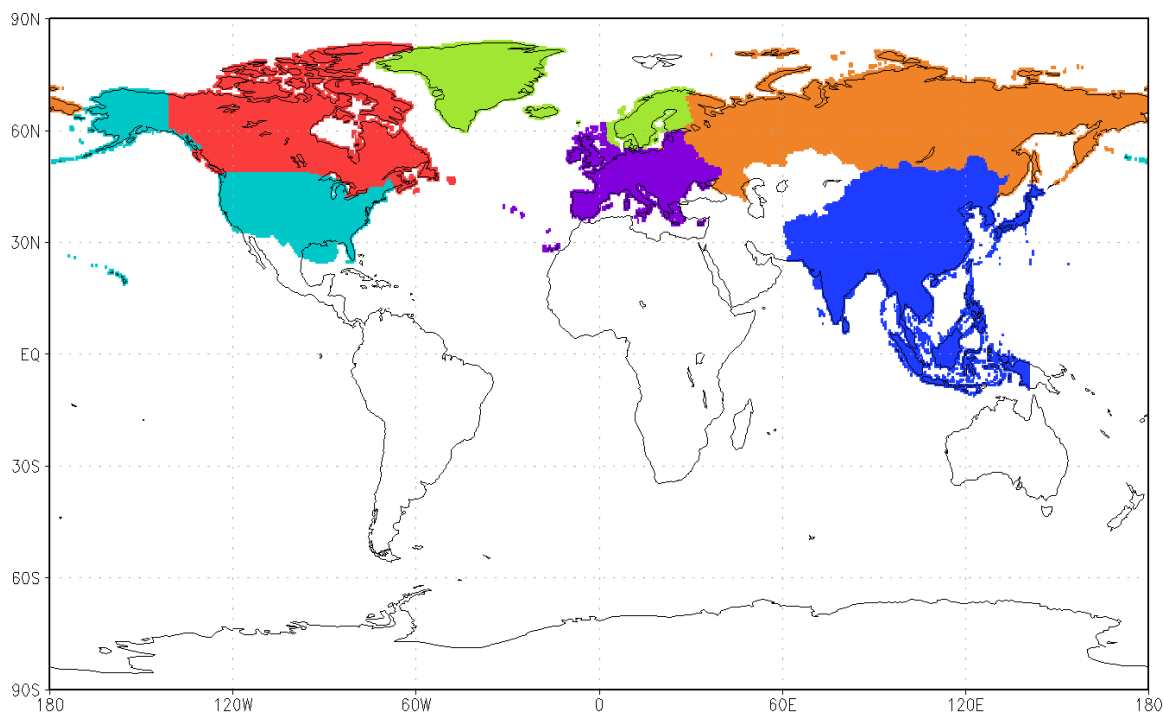

**Figure S1:** Definition of the 7 regions used in this study; USA, Canada, Nordic countries, Rest-of-Europe, Russia, East+South Asia, and Rest-of-World.

**Table S2a.** Global anthropogenic 2010 emissions of BC (Gg C), OC (Gg C), and SO<sub>2</sub> (Gg S).

| Global anthropogenic BC, OC (C) and SO <sub>2</sub> (S) 2010 emissions (Gg) |               |     |                 |        |     |                 |        |    |                 |                  |     |                 |                |     |                 |                     |      |                 |                   |      |                 |  |
|-----------------------------------------------------------------------------|---------------|-----|-----------------|--------|-----|-----------------|--------|----|-----------------|------------------|-----|-----------------|----------------|-----|-----------------|---------------------|------|-----------------|-------------------|------|-----------------|--|
|                                                                             | United States |     |                 | Canada |     |                 | Russia |    |                 | Nordic Countries |     |                 | Rest of Europe |     |                 | East and South Asia |      |                 | Rest of the world |      |                 |  |
|                                                                             | BC            | OC  | SO <sub>2</sub> | BC     | OC  | SO <sub>2</sub> | BC     | OC | SO <sub>2</sub> | BC               | OC  | SO <sub>2</sub> | BC             | OC  | SO <sub>2</sub> | BC                  | OC   | SO <sub>2</sub> | BC                | OC   | SO <sub>2</sub> |  |
| Domestic                                                                    | 49            | 120 | 102             | 25     | 51  | 22              | 22     | 45 | 82              | 9.3              | 26  | 4.3             | 146            | 253 | 311             | 1780                | 5642 | 1970            | 1020              | 3570 | 620             |  |
| Energy/industrial /waste                                                    | 13            | 39  | 3613            | 3.7    | 3.6 | 924             | 19     | 33 | 2182            | 1.8              | 1.6 | 51              | 27             | 37  | 2974            | 750                 | 1377 | 20583           | 148               | 469  | 10229           |  |
| Transport                                                                   | 131           | 109 | 49              | 18     | 15  | 17              | 52     | 57 | 44              | 10               | 6.4 | 2.2             | 170            | 90  | 66              | 608                 | 488  | 457             | 350               | 268  | 216             |  |
| Agricultural Fires                                                          | 16            | 55  | 5.9             | 1.8    | 6.5 | 0.7             | 24     | 77 | 3.4             | 0.9              | 2.7 | 0.2             | 27             | 90  | 7.3             | 175                 | 641  | 33              | 97                | 441  | 38              |  |
| Gas Flaring                                                                 | 4             | 1   | 0               | 2.9    | 0.6 | 0.0             | 65     | 13 | 0.2             | 1.1              | 0.2 | 0.0             | 3.7            | 0.7 | 0.0             | 15                  | 3.0  | 0.0             | 137               | 27   | 0.4             |  |

**Table S2b.** Global anthropogenic 2010 emissions of NO<sub>x</sub>, CO and VOC (Gg).

| <b>Global anthropogenic NO<sub>x</sub>, CO and VOC 2010 emissions (Gg)</b> |                 |       |      |                 |      |      |                 |      |      |                  |      |      |                 |       |      |                     |        |       |                   |       |      |  |
|----------------------------------------------------------------------------|-----------------|-------|------|-----------------|------|------|-----------------|------|------|------------------|------|------|-----------------|-------|------|---------------------|--------|-------|-------------------|-------|------|--|
|                                                                            | United States   |       |      | Canada          |      |      | Russia          |      |      | Nordic Countries |      |      | Rest of Europe  |       |      | East and South Asia |        |       | Rest of the world |       |      |  |
|                                                                            | NO <sub>x</sub> | CO    | VOC  | NO <sub>x</sub> | CO   | VOC  | NO <sub>x</sub> | CO   | VOC  | NO <sub>x</sub>  | CO   | VOC  | NO <sub>x</sub> | CO    | VOC  | NO <sub>x</sub>     | CO     | VOC   | NO <sub>x</sub>   | CO    | VOC  |  |
| Domestic                                                                   | 792             | 1800  | 1071 | 98              | 898  | 246  | 130             | 1085 | 402  | 25               | 348  | 106  | 750             | 6264  | 1407 | 2005                | 124900 | 12439 | 1349              | 75386 | 1242 |  |
| Energy/industrial/waste                                                    | 6402            | 7551  | 2941 | 568             | 2446 | 349  | 2578            | 4558 | 1951 | 257              | 1204 | 159  | 3634            | 6275  | 1745 | 19858               | 98438  | 2018  | 8277              | 16486 | 6324 |  |
| Transport                                                                  | 6553            | 28775 | 2598 | 770             | 2424 | 287  | 2852            | 6475 | 843  | 421              | 915  | 107  | 6088            | 11603 | 1861 | 16415               | 58903  | 5134  | 12223             | 51623 | 3170 |  |
| Agricultural Fires                                                         | 27              | 1140  | 125  | 3,3             | 138  | 15   | 6,5             | 1708 | 189  | 1,4              | 60   | 6,8  | 28              | 1967  | 212  | 61                  | 15158  | 1414  | 178               | 7936  | 277  |  |
| Gas Flaring                                                                | 2,8             | 12    | 0,00 | 2,2             | 9,6  | 0,00 | 65              | 388  | 0,00 | 0,96             | 3,9  | 0,00 | 4,5             | 12    | 0,00 | 15                  | 90     | 0,00  | 137               | 820   | 0,00 |  |

### Equilibrium Arctic surface temperature

The RCSs for the Arctic response region are given in Table S3. Figure S2 shows the sensitivity to Arctic BC forcing at different altitudes and are based on Flanner (2013).

**Table S3.** Arctic climate sensitivity factors in units of K/(W/m<sup>2</sup>)

| Forcing Location | Forcing Agent   |       |                    |                    |
|------------------|-----------------|-------|--------------------|--------------------|
|                  | Atmospheric BC  | Ozone | Scattering Aerosol | BC in snow and ice |
| 90°S - 28°S      | 0.06            | 0.06  | 0.06               | 0.18               |
| 28°S - 28°N      | 0.31            | 0.13  | 0.16               | 0.93               |
| 28°N - 60°N      | 0.15            | 0.05  | 0.17               | 0.45               |
| 60°N - 90°N      | VR <sup>a</sup> | 0.07  | 0.31               | 1.06               |

<sup>a</sup>VR indicates use of vertically-resolved forcing.

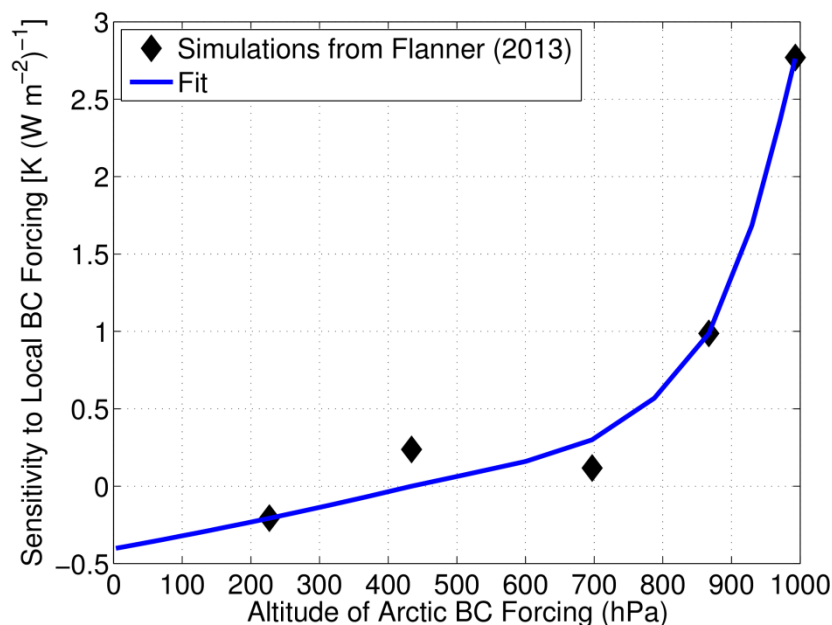

**Figure S2:** Arctic surface temperature response to BC radiative forcings exerted at different altitudes, derived from simulations described by Flanner (2013).

### Forcing calculations

Table S4 gives an overview of the estimated Arctic forcings for all combinations of sectors, components and regions of emissions. To illustrate that also RF exerted outside the Arctic is taken into account in eq. (1). Table S5 is included to show the direct RF by BC within the three other latitude bands for emissions in all sectors and emission regions. Note that in the final calculation of temperature response, all forcings (for all components) in all latitude bands are included (cf. eq. (1) in Methods). Table S6 shows the regional RF in each of the four latitude bands for global emissions of SLCFs. The forcing calculations for each model are available at <http://folk.uio.no/mariasan/data/>.

**Table S4.** Arctic model mean BC, OC and SO<sub>4</sub> RF (in mWm<sup>-2</sup>). Numbers in bracelets are the model range. For indirect forcings and snow/ice by sectors/regions only results from one model were available

| Arctic mean                 | Black carbon direct radiative forcing (mWm <sup>-2</sup> ) |                |                |                   |                |                        |                   |
|-----------------------------|------------------------------------------------------------|----------------|----------------|-------------------|----------------|------------------------|-------------------|
|                             | United States                                              | Canada         | Russia         | Nordic Countries  | Rest of Europe | East and South<br>Asia | Rest of the world |
| Domestic                    | 3.8 (1.8, 5.1)                                             | 2.1 (1.8, 2.5) | 4.3 (4.2, 4.4) | 1.3 (1.1, 1.5)    | 15 (14, 16)    | 258 (173, 401)         | 132 (18, 331)     |
| Energy/industrial<br>/waste | 1.3 (0.5, 1.6)                                             | 0.5 (0.3, 0.6) | 5.2 (3.7, 7.3) | 0.4 (0.3, 0.4)    | 3.5 (2.4, 4.6) | 91 (37, 132)           | 19 (4.0, 42)      |
| Transport                   | 11 (4.3, 15)                                               | 1.5 (0.9, 2.0) | 15 (9.1, 22.3) | 1.9 (1.5, 2.2)    | 18 (9.9, 24)   | 64 (22, 96)            | 41 (6.8, 93)      |
| Agricultural<br>Fires       | 1.4 (0.4, 1.9)                                             | 0.3 (0.2, 0.4) | 4.9 (3.1, 6.6) | 0.1 (0.07, 0.2)   | 3.7 (2.0, 4.8) | 25 (8.1, 40)           | 13 (2.0, 31)      |
| Grass+Forest<br>Fires       | 5.7 (2.7, 8.6)                                             | 36 (9.7, 57)   | 94 (48, 167)   | 0.05 (0.01, 0.05) | 0.5 (0.1, 0.7) | 46 (24, 75)            | 241 (18, 685)     |
| Gas Flaring                 | 0.2 (0.04, 0.4)                                            | 0.3 (0.2, 0.5) | 21 (21, 22)    | 0.2 (0.1, 0.2)    | 0.3 (0.1, 0.5) | 1.5 (0.1, 3.3)         | 16 (3.1, 33)      |

| Arctic mean                 | Black carbon snow/ice radiative forcing (mWm <sup>-2</sup> ) |        |        |                  |                |                        |                   |
|-----------------------------|--------------------------------------------------------------|--------|--------|------------------|----------------|------------------------|-------------------|
|                             | United States                                                | Canada | Russia | Nordic Countries | Rest of Europe | East and South<br>Asia | Rest of the world |
| Domestic                    | 1.0                                                          | 1.8    | 7.2    | 1.8              | 9.6            | 25                     | 4.6               |
| Energy/industrial<br>/waste | 0.2                                                          | 0.3    | 4.8    | 0.2              | 1.1            | 5.8                    | 1.5               |
| Transport                   | 2.1                                                          | 0.8    | 12     | 1.5              | 4.1            | 4.1                    | 2.8               |
| Agricultural<br>Fires       | 0.3                                                          | 0.2    | 2.7    | 0.05             | 0.9            | 1.3                    | 1.0               |
| Grass+Forest<br>Fires       | 1.2                                                          | 3.4    | 8.3    | 0.01             | 0.03           | 2.2                    | 0.7               |
| Gas Flaring                 | 0.05                                                         | 0.2    | 45.5   | 0.1              | 0.1            | 0.03                   | 1.6               |

| Arctic mean                 | Organic carbon direct radiative forcing (mWm <sup>-2</sup> ) |                    |                   |                      |                    |                        |                    |
|-----------------------------|--------------------------------------------------------------|--------------------|-------------------|----------------------|--------------------|------------------------|--------------------|
|                             | United States                                                | Canada             | Russia            | Nordic Countries     | Rest of Europe     | East and South<br>Asia | Rest of the world  |
| Domestic                    | -0.08 (-0.4, 0.3)                                            | 0.1 (-0.04, 0.4)   | 0.2 (-0.3, 0.9)   | -0.02 (-0.13, 0.17)  | 0.8 (-0.6, 3.4)    | -0.5 (-54, 54)         | -18 (-57, 2.0)     |
| Energy/industrial<br>/waste | -0.06 (-0.2, 0.04)                                           | 0.00 (-0.01, 0.02) | -0.01 (-0.3, 0.4) | 0.00 (-0.01, 0.01)   | -0.03 (-0.1, 0.1)  | -2.4 (-9.9, 3.3)       | -2.1 (-6.4, 0.2)   |
| Transport                   | -0.1 (-0.2, 0.01)                                            | 0.01 (-0.02, 0.07) | 0.2 (-0.6, 1.3)   | 0.00 (-0.05, 0.09)   | -0.02 (-0.2, 0.4)  | -0.8 (-4.4, 2.2)       | -1.1 (-3.5, 0.3)   |
| Agricultural<br>Fires       | -0.09 (-0.2, 0.01)                                           | 0.00 (-0.02, 0.01) | -0.1 (-0.4, 0.2)  | -0.01 (-0.01, 0.00)  | -0.2 (-0.3, -0.04) | -2.4 (-8.2, 1.2)       | -2.8 (-8.2, 0.1)   |
| Grass+Forest<br>Fires       | -1.4 (-3.3, 0.5)                                             | -4.6 (-11, 3.6)    | 13.0 (-15, 64)    | -0.01 (-0.01, -0.01) | -0.1 (-0.2, -0.06) | -3.1 (-26, 18)         | -76 (-230, 3.0)    |
| Gas Flaring                 | 0.00 (-0.01, 0.00)                                           | 0.01 (0.00, 0.02)  | 0.5 (-0.2, 1.7)   | 0.00 (0.00, 0.01)    | 0.00 (0.00, -0.00) | -0.01(-0.04, 0.00)     | -0.08 (-0.3, 0.04) |

| Arctic mean                 | Organic carbon indirect cloud radiative forcing (mWm <sup>-2</sup> ) |        |        |                  |                |                        |                   |
|-----------------------------|----------------------------------------------------------------------|--------|--------|------------------|----------------|------------------------|-------------------|
|                             | United States                                                        | Canada | Russia | Nordic Countries | Rest of Europe | East and South<br>Asia | Rest of the world |
| Domestic                    | -0.8                                                                 | -0.8   | -2.9   | -2.9             | -3.8           | -15.2                  | -2.4              |
| Energy/industrial<br>/waste | -0.3                                                                 | -0.1   | -2.4   | -0.2             | -0.8           | -5.5                   | -0.9              |
| Transport                   | -0.9                                                                 | -0.2   | -4.5   | -0.7             | -1.6           | -1.7                   | -0.8              |
| Agricultural<br>Fires       | -0.4                                                                 | -0.2   | -2.7   | -0.1             | -1.7           | -2.7                   | -1.1              |
| Grass+Forest<br>Fires       | -40                                                                  | -76    | -114   | -0.1             | -0.3           | -6.8                   | -3.0              |
| Gas Flaring                 | 0.0                                                                  | 0.0    | -3.0   | 0.0              | 0.0            | 0.0                    | -0.1              |

| Arctic mean                 | Sulphate direct radiative forcing (mWm <sup>-2</sup> ) |                      |                     |                      |                      |                        |                      |  |  |  |
|-----------------------------|--------------------------------------------------------|----------------------|---------------------|----------------------|----------------------|------------------------|----------------------|--|--|--|
|                             | United States                                          | Canada               | Russia              | Nordic Countries     | Rest of Europe       | East and South<br>Asia | Rest of the world    |  |  |  |
| Domestic                    | -0.4 (-0.8, 0.1)                                       | -0.07 (-0.09, -0.03) | -0.9 (-1.5, -0.4)   | -0.04 (-0.06, -0.02) | -1.5 (-1.9, -0.7)    | -8.7 (-20, -1.2)       | -4.5 (-12, -0.5)     |  |  |  |
| Energy/industrial<br>/waste | -22 (-39, 7.7)                                         | -9.8 (-14, -7.5)     | -34 (-47, -21)      | -0.97 (-1.2, -0.64)  | -34 (-46, -24)       | -115 (-259, -24)       | -93 (-239, -12)      |  |  |  |
| Transport                   | -0.14, (-0.24 -0.07)                                   | -0.07 (-0.10, -0.05) | -0.83 (-1.2, -0.61) | -0.05 (-0.07, -0.04) | -0.39 (-0.53, -0.22) | -2.1 (-4.3, -0.48)     | -1.5 (-3.9, -0.18)   |  |  |  |
| Agricultural<br>Fires       | -0.02 (-0.03, -0.01)                                   | -0.01 (-0.01, 0.00)  | -0.01 (-0.05, 0.05) | 0.00 (0.00, 0.00)    | -0.02 (-0.06, 0.03)  | -0.06 (-0.12, -0.02)   | -0.33 (-0.89, -0.03) |  |  |  |
| Grass+Forest<br>Fires       | -0.34 (-0.71, -0.10)                                   | -1.3 (-2.0, -0.98)   | -2.5 (-3.2, -1.1)   | 0.00 (0.00, 0.00)    | -0.01 (0.02, -0.01)  | -0.96 (-2.5, -0.14)    | -9.1 (-27, -0.16)    |  |  |  |
| Gas Flaring                 | 0.00 (0.00, 0.00)                                      | 0.00 (0.00, 0.00)    | -0.01 (-0.01, 0.00) | 0.00 (0.00, 0.00)    | 0.00 (0.00, 0.00)    | 0.00 (0.00, 0.00)      | 0.00 (0.00, 0.00)    |  |  |  |

| Arctic mean                 | Sulphate indirect cloud radiative forcing (mWm <sup>-2</sup> ) |        |        |                  |                |                        |                   |
|-----------------------------|----------------------------------------------------------------|--------|--------|------------------|----------------|------------------------|-------------------|
|                             | United States                                                  | Canada | Russia | Nordic Countries | Rest of Europe | East and South<br>Asia | Rest of the world |
| Domestic                    | -0.5                                                           | -0.2   | -1.7   | -0.2             | -2.3           | -5.9                   | -1.4              |
| Energy/industrial<br>/waste | -29                                                            | -34    | -87    | -4.1             | -64            | -86                    | -36               |
| Transport                   | -0.4                                                           | -0.2   | -2.0   | -0.2             | -0.6           | -2.0                   | -0.6              |
| Agricultural<br>Fires       | 0.0                                                            | 0.0    | -0.1   | 0.0              | -0.1           | -0.1                   | -0.1              |
| Grass+Forest<br>Fires       | -3.9                                                           | -6.2   | -11    | 0.0              | 0.0            | -0.4                   | -0.2              |
| Gas Flaring                 | 0.0                                                            | 0.0    | 0.0    | 0.0              | 0.0            | 0.0                    | 0.0               |

| Arctic mean             | Ozone direct radiative forcing (mWm <sup>-2</sup> ) |              |        |              |        |            |                  |              |                |             |                     |             |                   |            |
|-------------------------|-----------------------------------------------------|--------------|--------|--------------|--------|------------|------------------|--------------|----------------|-------------|---------------------|-------------|-------------------|------------|
|                         | United States                                       |              | Canada |              | Russia |            | Nordic Countries |              | Rest of Europe |             | East and South Asia |             | Rest of the world |            |
| Domestic                | 1.2                                                 | (1.0, 1.3)   | 0.3    | (0.2, 0.3)   | 0.3    | (0.3, 0.4) | 0.1              | (0.1, 0.1)   | 1.3            | (1.0, 1.5)  | 8.7                 | (7.0, 10)   | 1.8               | (0.6, 3.1) |
| Energy/industrial/waste | 8.5                                                 | (7.6, 9.4)   | 1.3    | (1.2, 1.4)   | 5.0    | (4.0, 6.1) | 0.6              | (0.4, 0.8)   | 4.0            | (2.7, 5.3)  | 19                  | (15, 22)    | 5.6               | (3.7, 7.5) |
| Transport               | 11                                                  | (11, 12)     | 2.0    | (1.8, 2.1)   | 6.1    | (5.0, 7.2) | 1.0              | (0.7, 1.2)   | 6.6            | (4.7, 8.5)  | 14                  | (9.8, 18)   | 7.9               | (5.2, 11)  |
| Agricultural Fires      | 0.2                                                 | (0.1, 0.2)   | 0.02   | (0.0, 0.02)  | 0.2    | (0.2, 0.2) | 0.01             | (0.01, 0.01) | 0.3            | (0.2, 0.3)  | 1.0                 | (0.9, 1.2)  | 0.3               | (0.2, 0.4) |
| Grass+Forest Fires      | 0.5                                                 | (0.5, 0.5)   | 3.5    | (3.5, 3.5)   | 8.5    | (8.5, 8.5) | 0.005            | (0.00, 0.00) | 0.01           | (0.0, 0.01) | 0.9                 | (0.9, 0.9)  | 0.2               | (0.2, 0.2) |
| Gas Flaring             | 0.01                                                | (0.00, 0.01) | 0.01   | (0.01, 0.01) | 0.3    | (0.2, 0.3) | 0.003            | (0.00, 0.00) | 0.01           | (0.0, 0.01) | 0.0                 | (0.0, 0.01) | 0.1               | (0.1, 0.1) |

**Table S5:** Model mean BC RF (in mWm<sup>-2</sup>) in latitude bands outside the Arctic (28°N-60°N, 28°S-28°N, and 90°S-28°S average). Numbers in bracelets are the model range. Similar forcing calculations has been done for all components (BC snow/ice, SO<sub>4</sub> direct and indirect, OC direct and indirect and ozone).

| 28°N-60°N mean          | Black carbon direct radiative forcing (mWm <sup>-2</sup> ) |            |        |            |        |            |                  |              |                |            |                     |            |                   |            |
|-------------------------|------------------------------------------------------------|------------|--------|------------|--------|------------|------------------|--------------|----------------|------------|---------------------|------------|-------------------|------------|
|                         | United States                                              |            | Canada |            | Russia |            | Nordic Countries |              | Rest of Europe |            | East and South Asia |            | Rest of the world |            |
| Domestic                | 6.8                                                        | (6.1, 8.0) | 2.2    | (1.7, 2.7) | 2.6    | (1.9, 3.6) | 0.5              | (0.3, 0.7)   | 17             | (12, 23)   | 349                 | (278, 434) | 146               | (44, 337)  |
| Energy/industrial/waste | 2.2                                                        | (1.9, 2.5) | 0.4    | (0.4, 0.5) | 3.3    | (2.2, 4.7) | 0.2              | (0.1, 0.2)   | 4.0            | (3.1, 5.5) | 128                 | (101, 149) | 25                | (14, 45)   |
| Transport               | 20                                                         | (17, 23)   | 1.6    | (1.4, 1.8) | 9.2    | (5.4, 13)  | 0.7              | (0.5, 1.0)   | 22             | (18, 27)   | 84                  | (53, 105)  | 57                | (34, 102)  |
| Agricultural Fires      | 2.4                                                        | (1.9, 2.7) | 0.2    | (0.2, 0.3) | 3.8    | (2.9, 5.1) | 0.1              | (0.04, 0.1)  | 4.3            | (3.4, 5.8) | 32                  | (21, 41)   | 16                | (7.9, 31)  |
| Grass+Forest Fires      | 4.2                                                        | (3.4, 5.2) | 14     | (3.6, 24)  | 33     | (22, 51)   | 0.002            | (0.00, .004) | 0.8            | (0.6, 1.0) | 46                  | (26, 73)   | 247               | (27, 685)  |
| Gas Flaring             | 0.5                                                        | (0.4, 0.6) | 0.2    | (0.1, 0.2) | 5.1    | (4.4, 6.6) | 0.1              | (0.1, 0.1)   | 0.2            | (0.2, 0.3) | 1.8                 | (0.4, 3.5) | 24                | (17, 37.6) |

| 28°S-28°N mean          | Black carbon direct radiative forcing (mWm <sup>-2</sup> ) |            |        |            |        |            |                  |            |                |            |                     |            |                   |            |
|-------------------------|------------------------------------------------------------|------------|--------|------------|--------|------------|------------------|------------|----------------|------------|---------------------|------------|-------------------|------------|
|                         | United States                                              |            | Canada |            | Russia |            | Nordic Countries |            | Rest of Europe |            | East and South Asia |            | Rest of the world |            |
| Domestic                | 0.9                                                        | (0.7, 1.0) | 0.1    | (0.1, 0.1) | 0.1    | (0.1, 0.1) | 0.0              | (0.0, 0.0) | 2.8            | (2.2, 3.5) | 139                 | (130, 148) | 119               | (104, 133) |
| Energy/industrial/waste | 0.3                                                        | (0.2, 0.3) | 0.0    | (0.0, 0.0) | 0.2    | (0.2, 0.3) | 0.0              | (0.0, 0.0) | 0.7            | (0.6, 0.9) | 38                  | (33, 43)   | 14                | (13, 14)   |
| Transport               | 2.8                                                        | (2.1, 3.5) | 0.1    | (0.0, 0.1) | 0.7    | (0.7, 0.7) | 0.1              | (0.1, 0.1) | 4.5            | (3.7, 5.2) | 30                  | (21, 38)   | 29                | (27, 31)   |
| Agricultural Fires      | 0.3                                                        | (0.2, 0.4) | 0.0    | (0.0, 0.0) | 0.3    | (0.3, 0.3) | 0.0              | (0.0, 0.0) | 0.9            | (0.7, 1.1) | 13                  | (10, 16)   | 8.5               | (8.1, 8.9) |
| Grass+Forest Fires      | 0.5                                                        | (0.5, 0.5) | 0.8    | (0.5, 1.0) | 1.1    | (0.6, 1.5) | 0.0              | (0.0, 0.0) | 0.3            | (0.3, 0.4) | 29                  | (20, 38)   | 250               | (175, 324) |
| Gas Flaring             | 0.1                                                        | (0.1, 0.2) | 0.0    | (0.0, 0.0) | 0.3    | (0.3, 0.4) | 0.0              | (0.0, 0.0) | 0.0            | (0.0, 0.0) | 1.1                 | (0.7, 1.5) | 13                | (12, 13)   |

| 90°S-28°S<br>mean           | Black carbon direct radiative forcing (mWm <sup>-2</sup> ) |                   |                   |                   |                   |                     |                   |  |
|-----------------------------|------------------------------------------------------------|-------------------|-------------------|-------------------|-------------------|---------------------|-------------------|--|
|                             | United States                                              | Canada            | Russia            | Nordic Countries  | Rest of Europe    | East and South Asia | Rest of the world |  |
| Domestic                    | 0.10 (0.00, 0.19)                                          | 0.02 (0.00, 0.03) | 0.02 (0.00, 0.03) | 0.00 (0.00, 0.01) | 0.18 (0.02, 0.34) | 36.80 (26, 47)      | 43 (30, 56)       |  |
| Energy/industrial/<br>waste | 0.03 (0.00, 0.07)                                          | 0.00 (0.00, 0.01) | 0.03 (0.00, 0.06) | 0.00 (0.00, 0.00) | 0.05 (0.01, 0.10) | 9.79 (4.4, 15)      | 5.3 (3.6, 7.0)    |  |
| Transport                   | 0.34 (0.01, 0.67)                                          | 0.01 (0.00, 0.03) | 0.10 (0.01, 0.19) | 0.01 (0.00, 0.02) | 0.30 (0.04, 0.56) | 8.57 (1.8, 15)      | 12 (7.8, 17)      |  |
| Agricultural Fires          | 0.04 (0.00, 0.08)                                          | 0.00 (0.00, 0.00) | 0.04 (0.01, 0.07) | 0.00 (0.00, 0.00) | 0.06 (0.01, 0.11) | 3.15 (0.4, 5.9)     | 5.2 (3.7, 6.7)    |  |
| Grass+Forest Fires          | 0.01 (0.00, 0.02)                                          | 0.01 (0.01, 0.01) | 0.05 (0.05, 0.06) | 0.00 (0.00, 0.00) | 0.01 (0.01, 0.01) | 6.74 (4.0, 9.4)     | 92 (88, 96)       |  |
| Gas Flaring                 | 0.01 (0.00, 0.03)                                          | 0.00 (0.00, 0.00) | 0.05 (0.01, 0.10) | 0.00 (0.00, 0.00) | 0.00 (0.00, 0.01) | 0.33 (0.01, 0.7)    | 1.6 (0.4, 2.8)    |  |

**Table S6.** Annual model mean RF in each latitude band (from global emissions) (in mWm<sup>-2</sup>). Numbers in bracelets are the model range.

| Latitude band | Radiative forcing (mWm <sup>-2</sup> ) |                   |                  |                   |                        |                          |
|---------------|----------------------------------------|-------------------|------------------|-------------------|------------------------|--------------------------|
|               | BC atm direct                          | BC snow/ice       | OC direct        | OC indirect       | SO <sub>4</sub> direct | SO <sub>4</sub> indirect |
| 60°N - 90°N   | 547 (288, 808)                         | 123 (86, 160)     | 34 (-35, 159)    | -245 (-303, -187) | -252 (-491, -51)       | -566 (-735, -397)        |
| 28°N - 60°N   | 661 (315, 1075)                        | 81 (44, 118)      | -68 (-154, 21)   | -377 (-389, -366) | -645 (-947, -225)      | -1814 (-2823, -804)      |
| 28°S - 28°N   | 582 (258, 883)                         | 0.08 (0.003, 0.1) | -141 (-186, -85) | -127 (-434, 179)  | -236 (-357, -100)      | -815 (-1228, -402)       |
| 90°S - 28°S   | 177 (37, 277)                          | 1 (1, 2)          | -22 (-65, 7)     | -15 (-126, 96)    | -46 (-73, -19)         | -161 (-180, -141)        |



Table S7 shows all the equilibrium responses for all sectors, regions and components as shown in in Figure 1.

**Table S7.** Arctic equilibrium surface temperature response (in K) as shown in Fig 1.

| Arctic equilibrium surface temperature response (K) |           |          |           |             |                        |                          |                       |
|-----------------------------------------------------|-----------|----------|-----------|-------------|------------------------|--------------------------|-----------------------|
|                                                     | BC direct | BC snow  | OC direct | OC indirect | SO <sub>4</sub> direct | SO <sub>4</sub> indirect | O <sub>3</sub> direct |
| <b>United States</b>                                |           |          |           |             |                        |                          |                       |
| Domestic                                            | 1.67E-03  | 2.17E-03 | -2.59E-04 | -1.62E-03   | -3.80E-04              | -6.54E-04                | 2.60E-04              |
| Energy+Industrial+Waste                             | 5.16E-04  | 4.82E-04 | -1.08E-04 | -4.60E-04   | -1.95E-02              | -3.54E-02                | 1.89E-03              |
| Transport                                           | 4.81E-03  | 3.65E-03 | -2.74E-04 | -1.31E-03   | -2.34E-04              | -3.92E-04                | 2.36E-03              |
| Agricultural Fires                                  | 5.65E-04  | 5.20E-04 | -1.50E-04 | -5.85E-04   | -2.08E-05              | -4.04E-05                | 3.61E-05              |
| Grass+Forest Fires                                  | 1.61E-03  | 1.25E-03 | -1.19E-03 | -1.44E-02   | -1.64E-04              | -1.35E-03                | 3.01E-05              |
| Gas Flaring                                         | 1.13E-04  | 5.75E-05 | -1.81E-06 | -7.82E-06   | -2.13E-07              | -1.21E-07                | 1.45E-06              |
| <b>Canada</b>                                       |           |          |           |             |                        |                          |                       |
| Domestic                                            | 8.17E-04  | 3.02E-03 | -2.42E-05 | -9.81E-04   | -6.25E-05              | -1.37E-04                | 4.59E-05              |
| Energy+Industrial+Waste                             | 1.41E-04  | 4.72E-04 | -3.18E-06 | -5.25E-05   | -6.91E-03              | -1.97E-02                | 1.88E-04              |
| Transport                                           | 5.21E-04  | 1.38E-03 | -1.51E-05 | -2.12E-04   | -6.44E-05              | -1.40E-04                | 2.56E-04              |
| Agricultural Fires                                  | 1.05E-04  | 4.01E-04 | -1.36E-05 | -1.65E-04   | -3.90E-06              | -8.73E-06                | 4.15E-06              |
| Grass+Forest Fires                                  | 7.34E-03  | 3.57E-03 | -3.70E-03 | -2.72E-02   | -6.00E-04              | -2.16E-03                | 1.49E-04              |
| Gas Flaring                                         | 1.16E-04  | 2.43E-04 | 2.14E-06  | -1.15E-05   | -2.33E-07              | -2.02E-07                | 1.02E-06              |
| <b>Russia</b>                                       |           |          |           |             |                        |                          |                       |
| Domestic                                            | 1.91E-03  | 9.08E-03 | 8.11E-06  | -1.43E-03   | -4.81E-04              | -7.40E-04                | 5.65E-05              |
| Energy+Industrial+Waste                             | 1.76E-03  | 6.12E-03 | -7.19E-05 | -1.12E-03   | -1.69E-02              | -3.56E-02                | 6.63E-04              |
| Transport                                           | 4.80E-03  | 1.52E-02 | -4.83E-05 | -2.08E-03   | -4.20E-04              | -8.19E-04                | 7.30E-04              |
| Agricultural Fires                                  | 1.61E-03  | 3.99E-03 | -1.92E-04 | -1.59E-03   | -9.82E-06              | -3.16E-05                | 4.25E-05              |
| Grass+Forest Fires                                  | 2.17E-02  | 9.15E-03 | 4.50E-04  | -4.43E-02   | -1.13E-03              | -3.83E-03                | 3.95E-04              |
| Gas Flaring                                         | 1.15E-02  | 4.93E-02 | 1.38E-04  | -9.85E-04   | -3.53E-06              | -8.41E-06                | 2.68E-05              |
| <b>Nordic Countries</b>                             |           |          |           |             |                        |                          |                       |
| Domestic                                            | 1.02E-03  | 2.00E-03 | -2.58E-05 | -1.14E-03   | -1.75E-05              | -6.23E-05                | 1.37E-05              |
| Energy+Industrial+Waste                             | 2.22E-04  | 2.79E-04 | -3.01E-06 | -6.23E-05   | -3.88E-04              | -1.46E-03                | 6.92E-05              |
| Transport                                           | 1.28E-03  | 1.63E-03 | -5.46E-06 | -2.66E-04   | -2.27E-05              | -7.72E-05                | 9.84E-05              |
| Agricultural Fires                                  | 5.96E-05  | 5.60E-05 | -5.50E-06 | -4.60E-05   | -8.00E-07              | -1.91E-06                | 1.52E-06              |
| Grass+Forest Fires                                  | 8.64E-06  | 6.94E-06 | -3.47E-06 | -3.18E-05   | -7.04E-07              | -2.28E-06                | 1.91E-07              |
| Gas Flaring                                         | 2.71E-04  | 1.17E-04 | 1.79E-07  | -1.10E-05   | -3.32E-07              | -7.00E-08                | 3.90E-07              |
| <b>Rest of Europe</b>                               |           |          |           |             |                        |                          |                       |
| Domestic                                            | 6.71E-03  | 1.20E-02 | -2.39E-05 | -3.94E-03   | -1.03E-03              | -1.50E-03                | 2.48E-04              |
| Energy+Industrial+Waste                             | 1.59E-03  | 1.52E-03 | -9.13E-05 | -5.58E-04   | -2.20E-02              | -3.44E-02                | 6.82E-04              |
| Transport                                           | 8.35E-03  | 5.47E-03 | -1.74E-04 | -1.27E-03   | -4.01E-04              | -4.33E-04                | 1.15E-03              |
| Agricultural Fires                                  | 1.54E-03  | 1.24E-03 | -2.71E-04 | -1.32E-03   | -2.43E-05              | -5.78E-05                | 4.96E-05              |
| Grass+Forest Fires                                  | 2.33E-04  | 4.76E-05 | -1.22E-04 | -2.73E-04   | -9.82E-06              | -1.76E-05                | 3.32E-07              |
| Gas Flaring                                         | 3.26E-04  | 1.27E-04 | -6.91E-07 | -1.37E-05   | -3.08E-07              | -1.14E-07                | 7.82E-07              |
| <b>South and East Asia</b>                          |           |          |           |             |                        |                          |                       |
| Domestic                                            | 9.63E-02  | 4.26E-02 | -1.95E-03 | -3.67E-02   | -5.72E-03              | -7.93E-03                | 4.35E-03              |
| Energy+Industrial+Waste                             | 3.15E-02  | 1.05E-02 | -2.10E-03 | -7.90E-03   | -7.20E-02              | -1.02E-01                | 7.65E-03              |
| Transport                                           | 2.24E-02  | 8.71E-03 | -5.36E-04 | -3.20E-03   | -1.06E-03              | -2.41E-03                | 7.95E-03              |
| Agricultural Fires                                  | 9.03E-03  | 3.80E-03 | -1.47E-03 | -4.65E-03   | -4.94E-05              | -1.94E-04                | 4.94E-04              |
| Grass+Forest Fires                                  | 1.57E-02  | 2.90E-03 | -1.62E-03 | -1.02E-02   | -3.91E-04              | -6.05E-04                | 5.43E-05              |
| Gas Flaring                                         | 6.04E-04  | 9.09E-05 | -5.31E-06 | -2.45E-05   | -2.53E-07              | -4.30E-07                | 1.28E-05              |
| <b>Rest of World</b>                                |           |          |           |             |                        |                          |                       |
| Domestic                                            | 5.84E-02  | 7.93E-03 | -5.86E-03 | -1.73E-02   | -2.12E-03              | -2.96E-03                | 3.52E-03              |
| Energy+Industrial+Waste                             | 8.12E-03  | 2.60E-03 | -9.50E-04 | -2.73E-03   | -4.23E-02              | -6.03E-02                | 5.38E-03              |
| Transport                                           | 1.77E-02  | 5.13E-03 | -5.14E-04 | -1.79E-03   | -8.18E-04              | -1.16E-03                | 8.93E-03              |
| Agricultural Fires                                  | 5.12E-03  | 1.61E-03 | -1.01E-03 | -2.91E-03   | -1.19E-04              | -2.04E-04                | 3.03E-04              |
| Grass+Forest Fires                                  | 1.12E-01  | 1.55E-03 | -2.34E-02 | -3.78E-02   | -2.68E-03              | -2.93E-03                | 1.38E-05              |
| Gas Flaring                                         | 7.78E-03  | 3.15E-03 | -4.29E-05 | -1.81E-04   | -5.01E-06              | -2.32E-06                | 9.09E-05              |

## Transient Arctic surface temperature response to mitigation of SLCFs

Figure S3 shows the transient response in annual mean Arctic surface temperature by component. The MFTR scenario also include significant reductions in methane which shows a slower response than the more short-lived SLCFs, but accounts for more than 50% of the net response from 2055 and onwards.

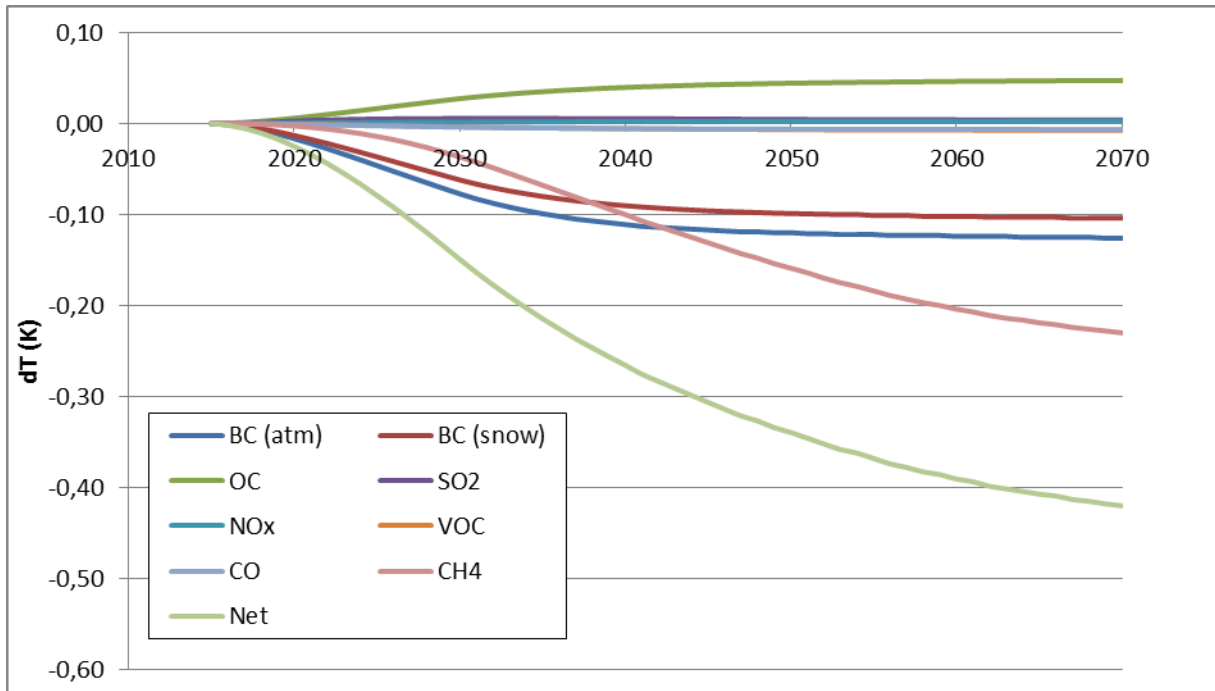

**Figure S3:** Estimated transient response in annual mean Arctic surface temperature by component using equation (3) above. For BC the response to atmospheric forcing and snow-albedo forcing is separated.

### Uncertainty estimate

The estimated total net impact of the reducing emissions of SLCFs (not including methane or HFCs) according to the MIT scenario is a reduction in the Arctic warming of 0.2K in 2050. The uncertainty in this estimate is quite difficult to quantify. There is uncertainty in the calculations of both the emission-to-forcing and the forcing-to-response parts. The latter can further be divided into a more general global climate sensitivity uncertainty (i.e. corresponding to but not equal to the transient climate response (TCR) from a linear growth in CO<sub>2</sub> since the forcing agents are different, mainly BC in the MIT scenario) and the uncertainty in the geographical patterns introduced through the RCS.

To give a rough estimate of the uncertainty in the Arctic response to the mitigation in the MIT scenario, we have split the uncertainty in three factors, assumed to be independent and uncorrelated. For the emission to forcing uncertainty we use the model range of the mid-latitude and Arctic forcing of all (global) BC emissions to estimate this uncertainty. This give an uncertainty of  $\pm 53\%$ .

For the global TCR as given by IPCC (Stocker et al., 2013) give a likely range of 1.0 to 2.5°C, corresponding to a  $\pm 43\%$  uncertainty.

For the uncertainty in the regional patterns of forcing-response we have very limited basis for estimating the uncertainty. Only a few very specific model results relating to the BC response have been published (Sand et al. 2013, Flanner 2013). Shindell (2012) evaluate the RCS-based approach by comparing it to four coupled atmosphere ocean climate models driven by historical changes in aerosols (Shindell et al., 2010), however using RCSs only for sulphate. Shindell concludes (after scaling with the global climate sensitivity of each model) that: "These ARTP results are in good accord with the actual responses in those models. Nearly all ARTP estimates fall within  $\pm 20\%$  of the actual responses". However, Shindell notes that the difference in the Arctic is larger. Based on this very limited information, we have assumed an uncertainty of  $\pm 50\%$  for the RCS coefficients.

The total uncertainty (roughly consistent with the 90% confidence interval) is thus taken to be  $\pm 84\%$ , so that the estimate for the total Arctic response in 2050 to the mitigation scenario (MIT) is  $0.2 \pm 0.17K$

For the equilibrium runs the indirect effects and the BC on snow to regional emissions were calculated with only one model (NorESM and CAM5, respectively). We have assumed that BC in snow has the same uncertainties as BC in the atmosphere and that the indirect effects have the same uncertainties as the direct effects.

## References

- Andersson. C., Langner. J., and Bergström. R.: Interannual variation and trends in air pollution over Europe due to climate variability during 1958–2001 simulated with a regional CTM coupled to the ERA40 reanalysis. *Tellus B*, **59**, 77–98 (2007)
- Bentsen. M., Bethke. I., Debernard. J. B., Iversen. T., Kirkevåg. A., Seland. Ø., Drange. H., Roelandt. C., Seierstad. I. A., Hoose. C., and Kristjánsson. J. E.: The Norwegian Earth System Model. NorESM1-M – Part 1: Description and basic evaluation of the physical climate. *Geosci. Model Dev.*, **6**, 687–720, doi:10.5194/gmd-6-687-2013 (2013)
- Flanner, M. G. Arctic climate sensitivity to local black carbon, *J. Geophys. Res. Atmos.*, **118**, 1840–1851, doi:[10.1002/jgrd.50176](https://doi.org/10.1002/jgrd.50176) (2013)
- Iversen. T., Bentsen. M., Bethke. I., Debernard. J. B., Kirkevåg. A., Seland. Ø., Drange. H., Kristjánsson. J. E., Medhaug. I., Sand. M., and Seierstad. I. A.: The Norwegian Earth System Model. NorESM1-M – Part 2: Climate response and scenario projections. *Geosci. Model Dev.*, **6**, 389–415. doi:10.5194/gmd-6-389-2013 (2013)
- Kirkevåg. A., Iversen. T., Seland. Ø., Hoose. C., Kristjánsson. J. E., Struthers. H., Ekman. A. M. L., Ghan. S., Griesfeller. J., Nilsson. E. D., and Schulz. M.: Aerosol–climate interactions in the Norwegian Earth System Model – NorESM1-M. *Geosci. Model Dev.*, **6**, 207–244. doi:10.5194/gmd-6-207-2013 (2013)
- Liu. X., Easter. R. C., Ghan. S. J., Zaveri. R., Rasch. P., Shi. X., Lamarque. J.-F., Gettelman. A., Morrison. H., Vitt. F., Conley. A., Park. S., Neale. R., Hannay. C., Ekman. A. M. L., Hess. P., Mahowald. N., Collins. W., Iacono. M. J., Bretherton. C. S., Flanner. M. G., and Mitchell. D.: Toward a minimal representation of aerosols in climate models: description and evaluation in the Community Atmosphere Model CAM5. *Geosci. Model Dev.*, **5**, 709–739 (2012)
- Ma. X., K. von Salzen. J. Li. Modelling sea salt aerosol and its direct and indirect effects on climate. *Atmos. Chem. Phys.*, **8**, 1311–1327 (2008)
- Myhre. G., Berglen. T. F., Johnsrud. M., Hoyle. C. R., Berntsen. T. K., Christopher. S. A., Fahey. D. W., Isaksen. I. S. A., Jones. T. A., Kahn. R. A., Loeb. N., Quinn. P., Remer. L., Schwarz. J. P., and Yttri. K. E.: Modelled radiative forcing of the direct aerosol effect with multi-observation evaluation. *Atmos. Chem. Phys.*, **9**, 1365–1392 (2009)
- Neale. R. B., Chen. C.-C., Gettelman. A., Lauritzen. P. H., Park. S., Williamson. D. L., Conley. A. J., Garcia. R., Kinnison. D., Lamarque. J.-F., Marsh. D., Mills. M., Smith. A. K., Tilmes. S., Vitt. F., Cameron-Smith. P., Collins. W. D., Iacono. M. J., Easter. R. C., Ghan. S. J., Liu. X., Rasch. P. J., and Taylor. M. A., Description of the NCAR Community Atmosphere Model (CAM5.0). NCAR Tech. Note NCAR/TN486+STR. [http://www.cesm.ucar.edu/models/cesm1.0/cam/docs/description/cam5\\_desc.pdf](http://www.cesm.ucar.edu/models/cesm1.0/cam/docs/description/cam5_desc.pdf).
- Peng. Y., K. von Salzen. J. Li. Simulation of mineral dust aerosol with Piecewise Log-normal Approximation (PLA) in CanAM4-PAM. *Atmos. Chem. Phys.*, **12**, 6891–6914 (2012)
- Robertson. L., Langner. J., and Engardt. M.: An Eulerian limited area atmospheric transport model. *J. Appl. Meteor.* **38**, 90–210 (1999).
- von Salzen. K., J. F. Scinocca. N. A. McFarlane. J. Li. J. N. S. Cole. D. Plummer. D. Versegny. M. C. Reader. X. Ma. M. Lazare. L. Solheim. The Canadian Fourth Generation Atmospheric Global Climate Model (CanAM4). Part I: Representation of Physical Processes. *Atmosphere-Ocean*. **51**, 104–125. doi:10.1080/07055900.2012.755610 (2013).
- von Salzen. K., 2006. Piecewise log-normal approximation of size distributions for aerosol modelling. *Atmos. Chem. Phys.*, **6**, 1351–1372 (2006)

Shindell, D. T. Evaluation of the absolute regional temperature potential. *Atmos. Chem. Phys.* **12**, 7955-7960 (2012).

Shindell, D., Schulz, M., Ming, Y., Takemura, T., Faluvegi, G., and Ramaswamy, V.: Spatial scales of climate response to inhomogeneous radiative forcing, *J. Geophys. Res.-Atmos.*, **115**, D19110 (2010).

Skeie, R. B., Berntsen, T. K., Myhre, G., Tanaka, K., Kvalevåg, M. M., and Hoyle, C. R.: Anthropogenic radiative forcing time series from pre-industrial times until 2010. *Atmos. Chem. Phys.*, **11**, 11827-11857. doi:10.5194/acp-11-11827-2011 (2011)

Stocker, T.F., D. Qin, G.-K. Plattner, L.V. Alexander, S.K. Allen, N.L. Bindoff, F.-M. Bréon, J.A. Church, U. Cubasch, S. Emori, P. Forster, P. Friedlingstein, N. Gillett, J.M. Gregory, D.L. Hartmann, E. Jansen, B. Kirtman, R. Knutti, K. Krishna Kumar, P. Lemke, J. Marotzke, V. Masson-Delmotte, G.A. Meehl, I.I. Mokhov, S. Piao, V. Ramaswamy, D. Randall, M. Rhein, M. Rojas, C. Sabine, D. Shindell, L.D. Talley, D.G. Vaughan and S.-P. Xie, 2013: Technical Summary. In: *Climate Change 2013: The Physical Science Basis. Contribution of Working Group I to the Fifth Assessment Report of the Intergovernmental Panel on Climate Change* [Stocker, T.F., D. Qin, G.-K. Plattner, M. Tignor, S.K. Allen, J. Boschung, A. Nauels, Y. Xia, V. Bex and P.M. Midgley (eds.)]. Cambridge University Press, Cambridge, United Kingdom and New York, NY, USA.

Wang, H., Easter, R. C., Rasch, P. J., Wang, M., Liu, X., Ghan, S. J., Qian, Y., Yoon, J.-H., Ma, P.-L., and Vinoj, V.: Sensitivity of remote aerosol distributions to representation of cloud–aerosol interactions in a global climate model. *Geosci. Model Dev.*, **6**, 765-782. doi:10.5194/gmd-6-765-2013. (2013)
